# Supplementary material
Source: PubMed Central journal article supplement (PMC1689530)
Supplement: 9881474s01.pdf [file 9881474s01.pdf]

This is an appendix to the paper by S. Azmeh, J. Owen, K. Sørensen, D. Grewcock & F. Gilbert 1998 Mimicry profiles are affected by human habitat changes. *Proc. R. Soc. Lond. B* **265**, 2285–2290.

## APPENDIX A

Summary of studies on hoverfly abundance from the literature, used for comparison of habitats with different degrees of disturbance. *n*, total number of hoverflies sampled; A, information is in abundance categories only (e.g. ‘rare’, ‘frequent’) (see text). Habitats are categorized (cat.) as ancient undisturbed forest (1), ancient disturbed woodland (2), recent disturbed woodland (3), or highly disturbed (such as urban) habitat (4). The median mimetic similarity value (ms) is given for each set of data.

| reference                     | country        | <i>n</i> | cat. | ms    |
|-------------------------------|----------------|----------|------|-------|
| Azmeh <i>et al.</i> (1998)    | Russia         | A        | 1    | 34.53 |
| Azmeh <i>et al.</i> (1998)    | Poland         | A        | 1    | 36.94 |
| Bankowska (1995)              | Poland         | A        | 1    | 35.78 |
| Bankowska (1995)              | Poland         | A        | 1    | 31.18 |
| Bankowska (1980)              | Poland         | A        | 2    | 31.18 |
| Bankowska (1980)              | Poland         | A        | 2    | 26.94 |
| Bankowska (1980)              | Poland         | A        | 2    | 20.37 |
| Bradescu (1986)               | Romania        | A        | 2    | 20.37 |
| Cepalak & Ruzicka (1966)      | Slovakia       | A        | 2    | 32.43 |
| Chemini <i>et al.</i> (1986)  | Italy          | 34       | 2    | 30.33 |
| Daccordi <i>et al.</i> (1980) | Italy          | 86       | 2    | 38.8  |
| Daccordi <i>et al.</i> (1980) | Italy          | 127      | 2    | 38.8  |
| Daccordi <i>et al.</i> (1980) | Italy          | 40       | 2    | 34.53 |
| Daccordi <i>et al.</i> (1980) | Italy          | 335      | 2    | 20.37 |
| Gilbert & Perry (1982)        | England        | 2063     | 2    | 20.37 |
| Gilbert (1981)                | England        | 1220     | 2    | 20.37 |
| Hanson (1985)                 | England        | A        | 2    | 20.37 |
| Kula (1981)                   | Czechoslovakia | 113      | 2    | 36.42 |
| Kula (1981)                   | Czechoslovakia | 47       | 2    | 36.42 |
| Kula (1981)                   | Czechoslovakia | 200      | 2    | 30.33 |
| Kula (1981)                   | Czechoslovakia | 47       | 2    | 38.8  |
| Kula (1981)                   | Czechoslovakia | 37       | 2    | 36.42 |
| Kula (1981)                   | Czechoslovakia | 118      | 2    | 36.42 |
| Kula (1981)                   | Czechoslovakia | 77       | 2    | 36.42 |
| Kula (1981)                   | Czechoslovakia | 181      | 2    | 30.33 |
| Kula (1981)                   | Czechoslovakia | 40       | 2    | 30.33 |
| Kula (1981)                   | Czechoslovakia | 59       | 2    | 36.42 |
| Kula (1981)                   | Czechoslovakia | 82       | 2    | 31.18 |
| Kula (1981)                   | Czechoslovakia | 255      | 2    | 30.33 |
| Kula (1981)                   | Czechoslovakia | 251      | 2    | 36.42 |
| Kula (1981)                   | Czechoslovakia | 125      | 2    | 30.33 |

| reference                    | country        | <i>n</i> | cat. | ms    |
|------------------------------|----------------|----------|------|-------|
| Kula (1981)                  | Czechoslovakia | 57       | 2    | 36.42 |
| Kula (1981)                  | Czechoslovakia | 211      | 2    | 30.33 |
| Kula (1981)                  | Czechoslovakia | 179      | 2    | 36.42 |
| Kula (1981)                  | Czechoslovakia | 90       | 2    | 36.42 |
| Kula (1981)                  | Czechoslovakia | 57       | 2    | 36.42 |
| Kula (1981)                  | Czechoslovakia | 68       | 2    | 26.94 |
| Kula (1981)                  | Czechoslovakia | 325      | 2    | 30.33 |
| Macgowan (1981)              | Scotland       | A        | 2    | 28.64 |
| Parmenter (1950)             | England        | A        | 2    | 20.37 |
| Röder (1979)                 | Austria        | A        | 2    | 22.75 |
| Simic & Vujic (1987)         | Yugoslavia     | A        | 2    | 22.75 |
| Simic (1987)                 | Yugoslavia     | A        | 2    | 26.24 |
| Speight & Lucas (1992)       | Lichtenstein   | A        | 2    | 16.52 |
| Speight & Lucas (1992)       | Lichtenstein   | A        | 2    | 24.85 |
| Speight & Lucas (1992)       | Lichtenstein   | A        | 2    | 20.37 |
| Speight & Lucas (1992)       | Lichtenstein   | A        | 2    | 31.18 |
| Speight (1983)               | Ireland        | A        | 2    | 30.33 |
| Stollar (1971)               | Slovakia       | 1326     | 2    | 35.46 |
| Stollar (1984)               | Czechoslovakia | 914      | 2    | 36.42 |
| Van der Goot (1967)          | Holland        | A        | 2    | 20.37 |
| Watts (1983)                 | England        | 6177     | 2    | 20.37 |
| Watts (1983)                 | England        | 4593     | 2    | 20.37 |
| Cepelak & Zajonc (1962)      | Slovakia       | A        | 3    | 35.46 |
| Cepelak & Zajonc (1962)      | Slovakia       | A        | 3    | 28.18 |
| Cepelak (1982)               | Slovakia       | 577      | 3    | 36.94 |
| Chemini <i>et al.</i> (1983) | Italy          | 51       | 3    | 35.46 |
| Chemini <i>et al.</i> (1983) | Italy          | 36       | 3    | 30.33 |
| Chemini <i>et al.</i> (1983) | Italy          | 16       | 3    | 30.33 |
| Chemini <i>et al.</i> (1983) | Italy          | 87       | 3    | 35.46 |
| Jentsch (1991)               | Germany        | A        | 3    | 17.56 |
| Kormann (1993)               | Germany        | A        | 3    | 35.46 |
| Kormann (1993)               | Germany        | A        | 3    | 38.8  |
| Kormann (1993)               | Germany        | A        | 3    | 47.87 |
| Kormann (1993)               | Germany        | A        | 3    | 31.18 |
| Kormann (1993)               | Germany        | A        | 3    | 36.42 |
| Kormann (1993)               | Germany        | A        | 3    | 36.42 |
| Kormann (1993)               | Germany        | A        | 3    | 3.85  |
| Kormann (1993)               | Germany        | A        | 3    | 20.37 |
| Kormann (1993)               | Germany        | A        | 3    | 35.46 |
| Laurence (1950)              | England        | A        | 3    | 17.56 |
| Laurence (1950)              | England        | A        | 3    | 46.33 |
| Röder (1979)                 | Germany        | A        | 3    | 20.37 |
| Röder (1980)                 | Germany        | 679      | 3    | 20.37 |
| Speight (1983)               | Ireland        | A        | 3    | 15.45 |
| Speight (1983)               | Ireland        | A        | 3    | 36.42 |
| Speight (1983)               | Ireland        | A        | 3    | 32.97 |
| Speight (1983)               | Ireland        | A        | 3    | 31.18 |
| Speight (1992)               | Lichtenstein   | A        | 3    | 17.41 |
| Speight (1992)               | Lichtenstein   | A        | 3    | 35.46 |

| reference                    | country      | <i>n</i> | cat. | ms    |
|------------------------------|--------------|----------|------|-------|
| Speight (1992)               | Lichtenstein | A        | 3    | 17.25 |
| Ssymank (1991)               | Germany      | 283      | 3    | 34.57 |
| Stollar (1974)               | Slovakia     | 255      | 3    | 35.46 |
| Torp (1964)                  | Denmark      | 766      | 3    | 19.36 |
| Torp (1983)                  | Denmark      | A        | 3    | 20.37 |
| Torp (1983)                  | Denmark      | A        | 3    | 26.94 |
| Veltman (1979)               | Holland      | A        | 3    | 20.37 |
| Veltman (1979)               | Holland      | A        | 3    | 10.59 |
| Veltman (1979)               | Holland      | A        | 3    | 30.33 |
| Veltman (1979)               | Holland      | A        | 3    | 17.56 |
| Bankowska (1981)             | Poland       | A        | 4    | 36.42 |
| Bankowska (1981)             | Poland       | A        | 4    | 17.25 |
| Bankowska (1981)             | Poland       | A        | 4    | 36.42 |
| Bankowska (1981)             | Poland       | A        | 4    | 36.42 |
| Bankowska (1982)             | Poland       | A        | 4    | 22.75 |
| Bankowska (1982)             | Poland       | A        | 4    | 22.75 |
| Bankowska (1982)             | Poland       | A        | 4    | 20.37 |
| Bankowska (1982)             | Poland       | A        | 4    | 20.37 |
| Bankowska (1982)             | Poland       | A        | 4    | 22.75 |
| Barkemeyer (1992)            | Germany      | 2043     | 4    | 20.37 |
| Chemini <i>et al.</i> (1985) | Italy        | 49       | 4    | 36.42 |
| Chemini <i>et al.</i> (1985) | Italy        | 37       | 4    | 26.94 |
| Chemini <i>et al.</i> (1985) | Italy        | 43       | 4    | 26.94 |
| Dawe & McGlashan (1987)      | England      | 516      | 4    | 36.42 |
| Fassotte & Grootaert (1981)  | Belgium      | 221      | 4    | 20.37 |
| Gilbert (1981)               | England      | 3660     | 4    | 36.42 |
| Gilbert (1981)               | England      | 3205     | 4    | 36.42 |
| Jacob-Remacle (1980)         | Belgium      | 391      | 4    | 26.94 |
| Kormann (1993)               | Germany      | 886      | 4    | 34.75 |
| Owen (1991)                  | England      | 23213    | 4    | 20.37 |
| Parmenter (1942)             | England      | A        | 4    | 20.37 |
| Parmenter (1954)             | England      | A        | 4    | 26.94 |
| Pellmann & Nahhal (1991)     | Germany      | 7493     | 4    | 26.94 |
| Plant (1986)                 | England      | A        | 4    | 20.37 |
| Speight (1983)               | Ireland      | A        | 4    | 31.68 |
| Torp (1983)                  | Denmark      | A        | 4    | 22.75 |
| Zucchi & Fischer (1991)      | Germany      | A        | 4    | 31.18 |

## REFERENCES

- Bankowska, R. 1980 Fly communities of the family Syrphidae in natural and anthropogenic habitats of Poland. *Memorabilia Zool. Warsaw* **33**, 3–93.
- Bankowska, R. 1981 Zoocoenological bases of the formation of the natural environment of a housing estate at Bialoleka Dworska in Warsaw. 1. Species composition and structure of the fauna of the proposed housing estate: hoverflies (Diptera, Syrphidae). *Fragmenta Faunistica Warsaw* **26**, 407–420.
- Bankowska, R. 1982 Species composition and origin of the fauna of Warsaw. 2. Hoverflies (Diptera, Syrphidae) of Warsaw and Mazovia. *Memorabilia Zool. Warsaw* **35**, 57–78.
- Bankowska, R. 1995 Syrphidae (Diptera) of Puszcza Bialowieska. *Fragmenta Faunistica Warsaw* **37**, 451–483.
- Barkemeyer, W. 1992 On the hoverfly fauna of the Bürgerpark in Bremen (Diptera, Syrphidae). *Abh. Naturwiss. Verein. Bremen* **42**, 127–141.
- Bradescu, V. 1986 Dipterological studies (Syrphidae) in the Domogled-Cerna Valley nature reserve. *Trav. Mus. Hist. Nat. 'Grigore Antipa' Bucharest* **28**, 121–132.
- Cepelak, J. 1982 Species representation of some families of higher Diptera of the research project IBP Bab. *Folia Facult. Sci. Nat. Univ. Purkyniana Brunensis* **23**, 17–27.
- Cepelak, J. & Ruzicka, R. 1966 On the ecology of syrphid flies of Pol'ana (Syrphidae, Diptera). *Acta Zootechn. Univ. Agric. Nitra*. **14**, 138–147.
- Cepelak, J. & Zajonc, I. 1962 Zoogeographical assessment of the hoverflies (Diptera, Syrphidae) of the Nitrianska Kotlina basin and the surrounding mountains. *Biologické Práce VIII B Entomologické Problemy, Bratislava* **2**, 5–28.

- Chemini, C., Daccordi, M. & Mason, F. 1983 Syrphidae (Diptera) caught in two forest sites near Ala (Province of Trento). *Studi Trentini Sci. Nat. (Acta Biol.)* **60**, 125–135.
- Chemini, C., Daccordi, M. & Mason, F. 1985 Aphidophagous species in syrphid communities from the provinces of Trento and Verona. *Atti XIV Congress Nazionale del Italiano Entomologia* (Palermo), pp. 73–79.
- Chemini, C., Daccordi, M. & Mason, F. 1986 The syrphid fauna of a larch wood (*Larix decidua* Mill.) from the Monti Lessini (Province of Trento) (Diptera: Syrphidae). *Studi Trentini Sci. Nat. (Acta Biol.)* **62**, 99–102.
- Daccordi, M., Mason, F. & Gazzanelli, G. 1980 Syrphid flies from a restricted forest area of the Lessini Mountains (Province of Trento) (Diptera, Syrphidae). *Studi Trentini Sci. Nat. (Acta Biol.)* **57**, 247–258.
- Dawe, G. & McGlashan, S. 1987 The ecology of urban hoverflies in relation to spontaneous and managed vegetation. *Bull. Br. Ecol. Soc.* **18**, 168–171.
- Fassotte, C. & Grootaert, P. 1981 Contribution to the study of the Diptera fauna captured in autumn by Malaise trap at Ottignies (Belgium, Brabant). *Bull. K. Belg. Inst. Nat. Wet.* **53**, 1–15.
- Gilbert, F. S. 1981 *Morphology and the foraging ecology of hoverflies (Diptera: Syrphidae)*. PhD thesis, University of Cambridge.
- Gilbert, F. S. & Perry, I. 1982 The hoverflies (Diptera, Syrphidae) of Hayley Wood. *Nature Cambs.* **25**, 41–45.
- Hanson, M. W. 1985 A provisional list of the larger Brachycera, Syrphidae and Conopidae of the Epping Forest area. *Proc. Trans. Br. Entomol. Nat. Hist. Soc.* **18**, 37–48.
- Jacob-Remacle, A. 1980 Diptera: Syrphidae and Coleoptera: Carabidae trapped in three gardens of Liege ‘intra muros’. *Bull. Soc. R. Sci. Liege* **49**, 378–385.
- Jentsch, M. 1991 The syrphid fauna of a field hedge in the Goldene Aue (Diptera: Syrphidae). *Entomol. Nachr. Berlin* **35**, 193–196.

- Kormann, K. 1993 Hoverflies from the surroundings of Karlsruhe (Diptera, Syrphidae). *Entomofauna* **14**, 33–56.
- Kula, E. 1981 Hoverflies (Diptera, Syrphidae) of various spruce forest vegetation tiers of the CSR. *Casopis Slezskeho Musea v Opava. A (Hist. Nat.)* **30**, 45–61.
- Laurence, B. R. 1950 Syrphidae (Diptera) in Bedfordshire. *Entomol. Mon. Mag.* **86**, 351–353.
- MacGowan, I. 1981 Hoverflies of the Stirling area. *Forth Nat. Hist.* **6**, 63–74.
- Owen, J. 1991 *Ecology of a garden*. Cambridge University Press.
- Parmenter, L. 1942 The Diptera of Limpsfield Common. *London Nat.* **1941**, 18–33.
- Parmenter, L. 1950 The Diptera of Bookham Common. *London Nat.* **1949**, 98–133.
- Parmenter, L. 1954 The flies of Cripplegate bombed site, City of London. *London Nat.* **33**, 89–100.
- Pellmann, H. & Nahhal, M. K. 1991 Research on the syrphid fauna (Diptera) of the Botanical Garden of the University of Leipzig. *Entomol. Nachr. Berlin* **35**, 181–187.
- Plant, C. W. 1986 A working list of the hoverflies (Diptera: Syrphidae) of the London area. *London Nat.* **65**, 109–117.
- Röder, G. 1979 On the hoverfly fauna (Diptera, Syrphidae) of middle Franconia in comparison with two sites in Kärnten and Württemberg. *Mitt. Entomol. Ver. Stuttgart* **14**, 25–56.
- Röder, G. 1980 On the hoverfly fauna (Diptera, Syrphidae) of the area around Hersbruck. *Mitt. München. Entomol. Ges.* **70**, 35–48.
- Simic, S. 1987 Fauna Durmitora. 2. Syrphidae (Insecta, Diptera), a biogeographical and ecological analysis of the hoverflies of Durmitor, with a survey of the hoverflies of Montenegro. *Crnogorska akademiya Nauka i Umjetnosti, Posebna* **21**, 11–154.

- Simic, S. & Vujic, A. 1987 The syrphid fauna (Diptera) of the Tisa basin in Jugoslavia. *Tiscia (Szeged)* **22**, 121–128.
- Speight, M. C. D. 1983 Flies: Diptera. In *Laos: an environmental history* (ed. J. Feehan), pp. 172–178 and 501–506. Eire: Ballykilcavan Press.
- Speight, M. C. D. 1992 Distribution data, threat categories and site evaluation. In *Faunal inventories of sites for cartography and nature conservation (Proc. 8th Int. Coll. Eur. Inv. Surv.)* (ed. J. L. van Goethem & P. Grootaert), pp. 7–21. Brussels: Brussels Institute for Natural Science.
- Speight, M. C. D. & Lucas, J. A. W. 1992 Liechtenstein Syrphidae (Diptera). *Ber. Bot.-Zool. Ges. Liechtenstein-Sargans-Werdenberg* **19**, 327–463.
- Ssymank, A. 1991 The functional importance of vegetation mosaics of a forest area of the Black Forest foothill zone for flower-visiting insects—studied using hoverflies (Diptera: Syrphidae) as an example. *Phytocoenologia* **19**, 307–390.
- Stollar, S. 1971 The representation of syrphids (Diptera, Syrphidae) by species in a wooded area of the Bab Research Project. *Entomol. Problemy Bratislava* **9**, 27–34.
- Stollar, S. 1974 Contribution to knowledge of the hoverflies (Diptera, Syrphidae) of the Vel'ha Kobyla mountains. *Folia Facult. Sci. Nat. Univ. Purkynianae Brunensis* **15**, 67–69.
- Stollar, S. 1984 The seasonal incidence of syrphids in oak-hornbeam forests. *Biologia Bratislava* **39**, 627–632.
- Torp, E. 1964 The Syrphidae in the parish of Aulum in West Jutland, Denmark. *Flora Fauna* **70**, 101–128.
- Torp, E. 1983 New faunistic contributions to the list of the syrphids of Denmark (Diptera: Syrphidae). 3. *Entomol. Medd.* **50**, 21–35.
- Van der Goot, V. S. 1967 Investigations on the Syrphidae from the Heilooër forest. *Entomol. Ber. Amsterdam* **27**, 135–137.

Veltman, A. 1979 Hoverflies from the Amsterdam wood (Diptera, Syrphidae). *Entomol. Ber. Amsterdam* **39**, 136–139.

Watts, J. O. 1983 *A comparative study of the Syrphidae (Diptera) from different habitats within Bernwood Forest*. PhD thesis, Oxford Polytechnic.

Zucchi, H. & Fischer, B. 1991 Presence of hoverflies (Diptera: Syrphidae) in the region of Osnabrück. *Drosera, Oldenburg* **91**, 25–45.
